# Supplementary material
Source: Springer Nature journal article supplement (https://www.springermedizin.de/resource/supplementary/12885_2008_1167_MOESM5_ESM.pdf/9471296)
Supplement: MOESM5 [file 9471296]

|               |   |   |   |   |   |   |
|---------------|---|---|---|---|---|---|
| PERK siRNA    | - | - | - | - | + | + |
| control siRNA | - | - | + | + | - | - |
| CS treatment  | - | + | - | + | - | + |

p-eIF2 $\alpha$

eIF2 $\alpha$

GAPDH

Panel A

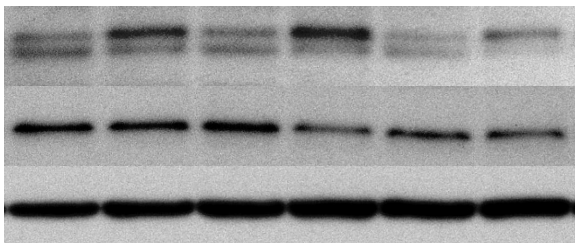

Lane 1 2 3 4 5 6

|               |   |   |   |   |   |   |
|---------------|---|---|---|---|---|---|
| PERK siRNA    | - | - | - | - | + | + |
| control siRNA | - | - | + | + | - | - |
| thapsigargin  | - | + | - | + | - | + |

p-eIF2 $\alpha$

eIF2 $\alpha$

GAPDH

Panel B

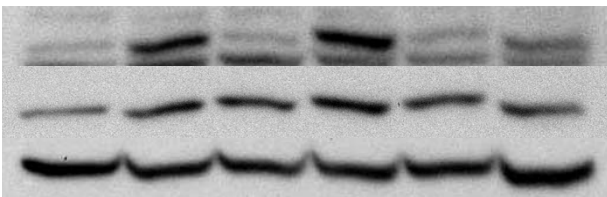

Lane 1 2 3 4 5 6
